# Supplementary material for: The ctpF Gene Encoding a Calcium P-Type ATPase of the Plasma Membrane Contributes to Full Virulence of Mycobacterium tuberculosis
Source: MDPI journal article supplement (doi:10.3390/ijms23116015), 2022-05-27

**Table S1. Bacterial strains, plasmids and primers used in this study**

| Strains                           | Relevant features                                                                                                                                        | Reference        |
|-----------------------------------|----------------------------------------------------------------------------------------------------------------------------------------------------------|------------------|
| <i>Mycobacterium tuberculosis</i> |                                                                                                                                                          |                  |
| H37Ra                             | Slow-growing virulent strain, Amp <sup>R</sup> , Chx <sup>R</sup> , Cb <sup>R</sup>                                                                      | ATCC 25177       |
| H37Rv                             | Slow-growing attenuated strain, Amp <sup>R</sup> , Chx <sup>R</sup> , Cb <sup>R</sup>                                                                    | ATCC 25618       |
| H37Rv:pJV53                       | Recombineering strain (with pJV53), Amp <sup>R</sup> , Chx <sup>R</sup> , Cb <sup>R</sup> , Km <sup>R</sup>                                              | This study       |
| H37Rv $\Delta$ ctpF               | $\Delta$ ctpF, gene replaced by a Hyg <sup>R</sup> cassette                                                                                              | This study       |
| Plasmids                          | Relevant features                                                                                                                                        | Reference        |
| pJV53                             | Derivative of pLAM12 with Che9c 60–61 genes under control of the acetamidase promoter                                                                    | Gift from Unizar |
| pYUB854                           | Hyg <sup>R</sup> cassette is flanked by the $\gamma\delta$ -res sites and by two MCSs for directional cloning of the homologous recombination substrates | Gift from Unizar |
| pLNA22                            | 607 bp upstream and 520 bp downstream of <i>Mtb Rv1997 (ctpF)</i> in pYUB854                                                                             | This study       |
| Primer                            | Sequence (5'-3')                                                                                                                                         |                  |
| F-RT Dir                          | CAGTGATCTTCGGTGTGGTG                                                                                                                                     |                  |
| F-RT Rev                          | TGACTCGTTCACGCTCAATC                                                                                                                                     |                  |
| 16SrRNA dir                       | GAGATAGGCGTTCCCTTG TG                                                                                                                                    |                  |
| 16SrRNA rev                       | CTGGACATAAGGGGCATGAT                                                                                                                                     |                  |
| RTctpE dir                        | ACAACGAGCGGGCCTATCCG                                                                                                                                     |                  |
| RTctpE rev                        | GCCTGTTCTGCTCCTGCCA                                                                                                                                      |                  |
| RTctpH dir                        | TTGCTGCCCCGAATCCTGGA                                                                                                                                     |                  |
| RTctpH rev                        | GGCGAGGTCCCGGTGATAGC                                                                                                                                     |                  |
| A-RT-Dir                          | GACCACCTCGACGTTGTACC                                                                                                                                     |                  |
| A-RT-Rev                          | CAAGCTGTTTGAGACCACGA                                                                                                                                     |                  |
| I-RT-Dir                          | CTGTCCTACGAACCGGTGAT                                                                                                                                     |                  |
| I-RT-Rev                          | AGTAGCGCGTCGATATTGCT                                                                                                                                     |                  |
| pJV53 dir                         | GTCAGTCACCAACCCTCCAC                                                                                                                                     |                  |
| pJV53 rev                         | GAATCCTGCTTGGTGACAGC                                                                                                                                     |                  |
| ctpF_interno_dir                  | CTATGCACCCGACGTCCT                                                                                                                                       |                  |
| cpF_interno_rev                   | GAACCTGGTATCACGTTTTCG                                                                                                                                    |                  |
| Comp_Up-ctpF                      | TCGTCGAACACTCGTACCTG                                                                                                                                     |                  |

|                |                               |
|----------------|-------------------------------|
| Comp_Down_ctpF | CGTCCGCAACCTAGTTGAAT          |
| primerpYUB854  | GTGGCTCCCTCACTTTCTGG          |
| Hyg_dir_out    | ACTTCGAGGTGTTTCGAGGAG         |
| Bdir2013       | TTTTTCTAGATATCGGGGTGTGGGTGC   |
| Brev2013       | TTTTTCATGATACCACCAGCACGATCCAG |
| Adir2013       | TTTTCTCGAGCGGATGGCAAGACC      |
| Arev2013       | TTTGTCTAGCGCGCGTTACCACC       |

**Figure S1.** Construction of the *MtbH37Rv ctpF* mutant.

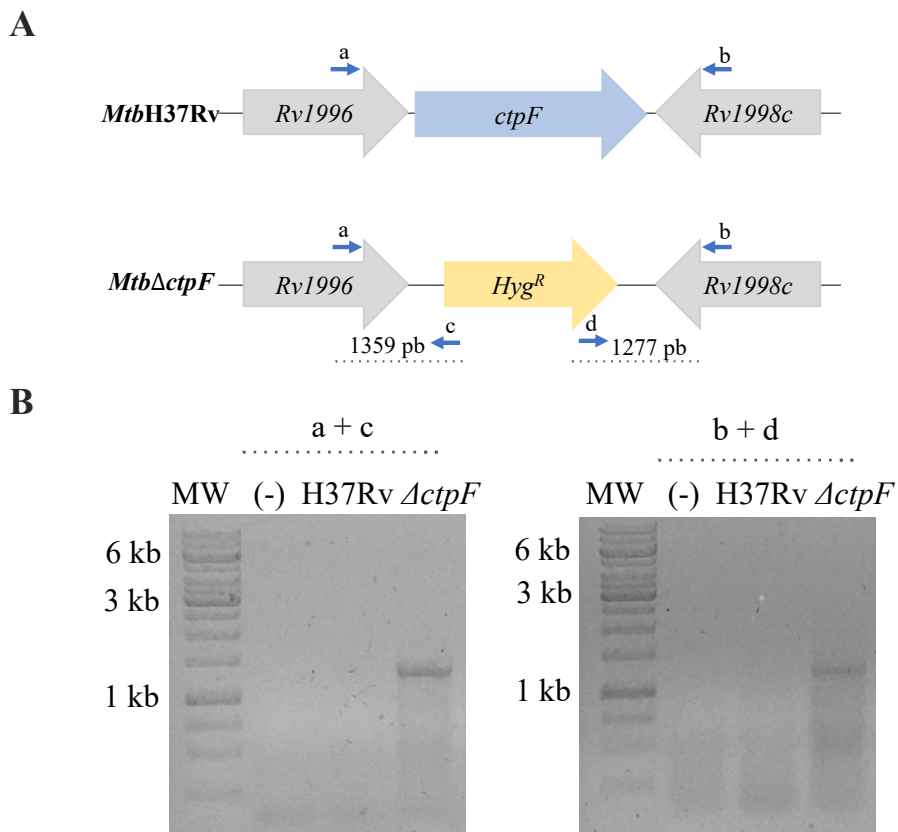

Supplement: s1 [file s1]
